# DECENT: Differential Expression with Capture Efficiency adjustment for single-cell RNA-seq data\*

Chengzhong Ye<sup>1</sup>, Terence P Speed<sup>1,4</sup> and Agus Salim<sup>1,2,3</sup>

<sup>1</sup>Bioinformatics Division, Walter and Eliza Hall Institute of Medical Research, Parville VIC 3052

<sup>2</sup>Department of Mathematics and Statistics, La Trobe University, Bundoora VIC 3086

<sup>3</sup>Baker Heart and Diabetes Institute, Melbourne, VIC 3004

<sup>4</sup>Department of Mathematics and Statistics, The University of Melbourne, Parkville VIC 3010

## Abstract

*Dropout is a common phenomenon in single-cell RNA-seq (scRNA-seq) data, and when left unaddressed affects the validity of the statistical analyses. Despite this, few current methods for differential expression (DE) analysis of scRNA-seq data explicitly model the dropout process. We develop DECENT, a DE method for scRNA-seq data that explicitly models the dropout process and performs statistical analyses on the inferred pre-dropout counts. We demonstrate using simulated and real datasets the superior performance of DECENT compared to existing methods. DECENT does not require spike-in data, but spike-ins can be used to improve performance when available. The method is implemented in a publicly-available R package.*

**Keywords**— Differential expression, single-cell RNA-seq, dropout, imputation

## Introduction

Recent developments in sequencing technology have enabled high-throughput whole-transcriptome profiling at single-cell resolution. Single-cell RNA-seq (scRNA-seq) allows the quantification of gene expression of thousands of individual cells in a single experiment. It has already led to profound new discoveries that could not have been made using data from bulk transcriptome

---

\*DECENT: differential expression with (molecule) capture efficiency adjustment for single-cell RNA-seq data; Adjusting for molecule capture efficiency improves differential expression analysis of single-cell RNA-seq data; Modeling molecule capture improves differential expression analysis of single-cell RNA-seq data

16 sequencing, ranging from the identification of novel cell types to the study of global patterns of  
17 stochastic gene expression (Kolodziejczyk et al., 2015) (Wagner et al., 2016). However, there are  
18 still many statistical challenges in drawing inferences from scRNA-seq data. Due to the small  
19 amount of starting material and the imperfect capturing of RNA molecules in current scRNA-seq  
20 experiments, failures to detect expressed transcripts in single cells is still common. This gives  
21 rise to the characteristic dropout phenomenon in scRNA-seq data, in which a gene shows zero  
22 or very low abundance in a fraction of cells in spite of moderate to high expression in others  
23 (Hashimshony et al., 2012) (Finak et al., 2015) (Ramskold et al., 2012). Also, the dropout rates  
24 can vary between cells and across genes (Brennecke et al., 2013), showing as a major source of  
25 unwanted variation in scRNA-seq data, with the first principal component of raw counts typically  
26 exhibiting high correlation with the proportions of zero counts (Risso et al., 2018). This unique  
27 feature of scRNA-seq will hinder downstream analyses if not properly modeled. Lots of effort has  
28 been made in order to alleviate this issue, including specialized normalization methods (Lun et al.,  
29 2016) (Bacher et al., 2017), clustering algorithms (Zeisel et al., 2015) (Wang et al., 2017) (Kiselev  
30 et al., 2017), and methods for differential expression analysis (Kharchenko et al., 2014) (Finak et al.,  
31 2015) (Jia et al., 2017).

32         One way to resolve this is through explicit modeling of the capturing process and hence  
33 separating the biological variation of interest from unwanted variation in the experimental procedures.  
34 For instance, imputation methods (Huang et al., 2018) (van Dijk et al., 2018) are designed to recover  
35 the pre-dropout expression matrix by modeling the process from RNA molecule to read count.  
36 However, a difficulty in modeling the molecule capturing and dropout events is that this process is  
37 usually mixed up with other sources of technical variation, such as amplification and sequencing  
38 biases (Wagner et al., 2016). The unique molecular identifier (UMI) barcoding approach has become  
39 increasingly popular in scRNA-seq experiments as an effective way to address this issue (Islam et al.,

40 2014) (Svensson et al., 2017). Random barcodes are attached to cDNA molecules during reverse  
41 transcription. Each individual molecule from a particular gene in each cell is expected to have a  
42 distinct UMI (Islam et al., 2014). Therefore, after sequencing, by counting UMI barcodes instead of  
43 reads *per se*, the resulting UMI counts will be a faithful representation of the original cDNA counts,  
44 with amplification and sequencing bias largely avoided. But the UMI count will still show as zero if  
45 a RNA molecule failed to convert to cDNA, or was completely lost in amplification and sequencing.  
46 As a consequence, the main source of technical variation left in UMI counts is the loss of molecules  
47 during the experimental procedure, namely, dropouts. Hence, UMI count data provides us with an  
48 opportunity to model the molecule capturing process in depth. Also, given the distinct features of  
49 UMI-based data, it is necessary to build specific models in order to perform statistical tests reliably.

50       Currently scRNA-seq experiments mainly focus on cell-wise analyses such as clustering  
51 and trajectory inference for studying heterogeneity within cellular populations (Zeisel et al., 2015)  
52 (Trapnell et al., 2014) (Qiu et al., 2017). Nevertheless, differential gene expression (DE), as one of  
53 the most common gene-wise analyses, still plays an essential role in complementing these analyses.  
54 For example, it is used to identify cluster-specific markers for identifying the cell types. It is also  
55 used to derive disease-associated gene signatures (Sun et al., 2018) (Zhao et al., 2017) (Savas et al.,  
56 2018). However, DE methods originally designed for bulk RNA-seq tend to produce unreliable  
57 results due to failing to account for the extra variation in single-cell data (Jia et al., 2017) (Van den  
58 Berge et al., 2018). Driven by this, a few DE methods have been designed specifically for scRNA-seq  
59 data. All of them use some strategy to deal with the large variation and amount of zero observations.  
60 However, most of them do not distinguish biological from technical factors that are causing the  
61 phenomenon. For example, SCDE (Kharchenko et al., 2014) uses a mixture model to distinguish  
62 counts affected by dropout from the rest of the data. This model almost always assigns a probability  
63 of one that a zero count belongs to the dropout component, in essence assuming all observed zeroes

64 to be technical. MAST (Finak et al., 2015) uses a two-part generalized linear model in which the  
65 dropout rates are adjusted by the inclusion of the observed fraction of non-zero counts as a term  
66 in their regression model. This still does not differentiate the dropouts from real biological zeros.  
67 Additionally, the effect of dropout events is likely to be non-linear, especially for genes with low to  
68 moderate expression (Bacher et al., 2017), and so the inclusion of simple linear term that represents  
69 capture rates in the regression model is unlikely to be optimal. ZINB-WaVE (Van den Berge et al.,  
70 2018) uses a zero-inflated model directly fitted to the observed data to derive observation weights  
71 for adjusting bulk DE methods. Only Jia *et al.* (Jia et al., 2017) proposed a DE method, TASC, that  
72 relies on external RNA spike-in data (Jiang et al., 2011) to fit a technical variation model in order to  
73 explicitly cater for dropouts, thus enabling separation of the biological variation for DE analysis.  
74 They showed improved performance of their method compared with methods that perform DE  
75 analysis directly using the observed data. Note that the methods mentioned so far are not specifically  
76 designed for UMI-count data. There are two existing methods that considers the unique features of  
77 UMI-based experiments: Monocle2 (Qiu et al., 2017) and NBID (Chen et al., 2018). They both  
78 fit negative binomial models directly to the observed UMI count without any explicit modeling of  
79 dropouts.

80 Here we propose a novel model for the DE analysis of UMI-based scRNA-seq data. Leveraging  
81 the features UMI-count data, we are able to model the molecule capturing process precisely. We  
82 build a dropout model to account for the gene- and cell-specific properties of molecule capturing.  
83 This allows us to perform DE analysis on the inferred pre-dropout distributions of RNA molecules.  
84 We named our method **D**ifferential **E**xpression with **C**apture **E**fficiency adjustme**NT** (DECENT).  
85 DECENT can use the external RNA spike-in data to calibrate the dropout model, but also works  
86 without spike-ins. In this paper, we describe the DECENT model and benchmark it against existing  
87 methods using both simulated data and four real UMI-based scRNA-seq datasets. The results

88 showed improved performance of DECENT in various settings when compared to existing methods.

## 89 **Results**

### 90 **Modeling extra-binomial variation in the capture process**

91 scRNA-seq data are noisy largely due to the complex experimental procedures. Each step introduces  
92 different sources of technical variation, which are further magnified by the low amount of starting  
93 material in a single cell. With the UMI barcoding approach, we are able to avoid part of the technical  
94 variation in the read counts caused by amplification and sequencing, primarily the over- and under-  
95 representation of RNA molecules (Islam et al., 2014) (Wagner et al., 2016). However, we still need  
96 to deal with the extensive loss of molecules that happen at all stages in a scRNA-seq experiment. For  
97 UMI-based experiments, we may simplify the procedures of the actual transcript counts in single  
98 cells turning into final UMI counts into a single capturing process, in which each RNA molecule is  
99 captured with a certain probability that we term capture efficiency. We aim to design a dropout  
100 model to describe this capture process, which will enable us to infer the unobserved pre-dropout  
101 RNA molecule counts and perform DE analysis on them. It is natural to consider capture efficiencies  
102 to be cell-specific, as molecules from the same cell are in the same reaction chamber (well or droplet)  
103 during the capturing process. Previous models have considered between-cell variation of capture  
104 efficiency as a major source of technical variation in scRNA-seq data (Grun et al., 2014). By further  
105 assuming the capture of each molecule is independent within a cell, we obtain the simplest dropout  
106 model, a binomial thinning process  $B(y_{ij}, \eta_j)$ , where  $y_{ij}$  is the unobserved pre-dropout molecule  
107 count of gene  $i$  in cell  $j$  and  $\eta_j$  is the molecule capture efficiency in cell  $j$ . We denote the observed  
108 UMI counts by  $z_{ij}$ .

109 We now examine the plausibility of this simple dropout model using ERCC spike-in data.

110 ERCC spike-ins are synthetic RNA molecules added to the initial RNA pool in transcriptome  
111 profiling assays to measure technical variation (Jiang et al., 2011). The nominal molecule count of  
112 each spike-in added per cell ( $c_i$ ) is known, with no biological variation between cells expected. We  
113 thus use a Poisson distribution with rate  $c_i$  to model pre-dropout spike-in molecule count  $y_{ij}$ , where  
114  $c_i$  is the nominal molecule count of spike-in  $i$ . This is to model the sampling noise due to dilution.  
115 The known pre-dropout distribution of spike-in data enables us to focus on examining the dropout  
116 model. In total, we investigated six ERCC spike-in datasets, including three plate-based (Tung  
117 et al., 2017) (Zeisel et al., 2015) (Grun et al., 2014) and three droplet-based experiments (Macosko  
118 et al., 2015), (Klein et al., 2015), (Zheng et al., 2017) (Supplementary Table 1). Taking the Tung  
119 *et al.* data as an example, we first estimated the capture efficiencies  $\eta_j$  under the hypothesized  
120 model. We then used deviance statistics to evaluate goodness-of-fit of this cell-specific binomial  
121 dropout model. It can be easily calculated as a log-likelihood ratio (See Supplementary Methods).  
122 Under the null hypothesis that the binomial dropout model is adequate, the deviances approximately  
123 follow a  $\chi^2$  distribution of with degree of freedom ( $\#$ spike-ins -  $\#$ parameters). However, as shown  
124 in Fig.1a, the observed distribution of cell-wise deviances is evidently shifted towards the higher  
125 values, indicating a poor fit to the data.

126 This shows the inadequacy of the cell-specific binomial dropout model. It could be due to the  
127 spike-in-wise variation of capture efficiency or a clumping of molecules in which the capture events  
128 are actually not independent within a cell. Further analyses suggests the former as a more probable  
129 main cause (Supplementary Fig.1). We model this extra variation by allowing capture efficiencies  $\eta_j$   
130 to have a beta distribution with dispersion parameter  $\rho$  instead of being constant in a cell, resulting in  
131 a beta-binomial dropout model,  $BB(y_{ij}, \eta_j, \rho)$ . Note that this is not the conventional parametrization  
132 of beta-binomial (See Methods). We then investigated whether a constant, cell-specific  $\rho$  is adequate.  
133 Towards this end, we looked at the variation of  $\rho$  across spike-ins. If we estimate  $\rho_i$  for each spike-in

134 separately, a negative correlation between the spike-in-specific  $\rho_i$  estimates and the spike-in nominal  
135 count  $c_i$  can be observed (Fig.1b). This indicates a standard cell-wise beta-binomial dropout model  
136 with a single  $\rho_j$  for the all genes will not adequately describe the variation in the capture process.  
137 To deal with this, we constructed a simple logistic linear model for cell and gene-specific  $\rho_{ij}$ :

$$\text{logit}(\rho_{ij}) = \tau_{0j} + \tau_{1j} \cdot \log(c_i) \quad (1)$$

138 where  $\tau_j = (\tau_{0j}, \tau_{1j})$  are the intercept and slope determining how  $\rho_{ij}$  depends on  $c_i$  in cell  $j$ . Using  
139 spike-ins, the estimation of  $\tau_j$  by maximum-likelihood is straightforward (see Methods). As a  
140 final examination, we fit both the binomial and this beta-binomial dropout models to the data  
141 and compared their goodness-of fit. Since the two models have different degrees of freedom, to  
142 facilitate comparison, we standardized and transformed the deviances of both models by forming  
143  $\log(\text{deviance}/df)$ , which is expected to have a  $\log(\chi_{df}^2/df)$  distribution with mean 0. As expected,  
144 we found cell-wise  $\log(\text{deviance}/df)$  values under our beta-binomial model to be substantially  
145 smaller than those under the binomial dropout model for most of the cells (Fig.1c). We also observed  
146 that the distribution of  $\log(\text{deviance}/df)$  values under our beta-binomial model are centered around  
147 0, suggesting a good match to the null distribution. This indicates that our beta-binomial dropout  
148 model should satisfactorily account for variation in the molecule capturing process. The same  
149 analyses were carried out using the spike-in data from the other five experiments and similar results  
150 were obtained (Supplementary Fig.2).

## 151 **Inferring the distribution of pre-dropout molecule counts**

152 We now start considering the model for RNA molecules from endogenous genes. We expect the  
153 external spike-ins and endogenous transcripts to have similar but not identical capture processes.

154 Therefore, we use the same dropout model for endogenous genes with partially re-estimated  
155 parameters (See Methods for detail). To infer the pre-dropout molecule counts, we need to specify  
156 a distribution that characterizes them. We used a Poisson distribution to model the pre-dropout  
157 molecule count of spike-ins where no biological variation is expected. This is unlikely to be  
158 appropriate for endogenous genes. Instead, we chose to use the zero-inflated negative binomial  
159 (ZINB) distribution, which has been used in some scRNA-seq methods to model the observed  
160 counts (Risso et al., 2018) (Van den Berge et al., 2018). The ZINB distribution is a mixture of two  
161 components, a negative binomial distribution component and a structural zero component. The  
162 negative binomial (NB) distribution alone has been previously used in bulk DE methods (Robinson  
163 et al., 2010) (McCarthy et al., 2012) (Love et al., 2014) to model overdispersion in data due to  
164 gene-specific biological variation. In addition, we expect biological zeros at the single-cell level to  
165 be more abundant due to phenomena such as stochastic gene expression, state-dependent expression  
166 and heterogeneous cell composition, which are not observable in bulk RNA-seq experiments (Raj  
167 et al., 2006) (Shalek et al., 2013) (Buettner et al., 2015). The structural zero component is used to  
168 model these inflated biological zeros. These result in the DECENT framework that describes the  
169 molecule capture process. The pre-dropout RNA molecule count  $y_{ij}$  from gene  $i$  in cell  $j$  is assumed  
170 to follow a ZINB distribution with gene-specific dispersion and zero-inflation parameters. After  
171 molecule capturing, we observe an UMI count  $z_{ij}$  that is generated according to the beta-binomial  
172 dropout model (See Methods for detail). We use the DECENT model to distinguish biological  
173 from technical variation due to dropouts and perform differential expression analysis on the inferred  
174 pre-dropout distribution.

175         Next we investigated how well we can infer the pre-dropout counts by simulation studies. We  
176 simulated a dataset of 500 cells, 3000 endogenous genes and 50 detected spike-ins, with parameters  
177 empirically estimated from the Tung *et al.* dataset. We fit the DECENT model to this simulated data



178 and then looked into two main features of the pre-dropout counts: proportion of zeros and variance.  
179 We calculated the gene-wise zero fractions and variances of the inferred pre-dropout counts and  
180 found the values are very close to those calculated using the actual pre-dropout counts (Fig.2a, b).  
181 We further calculated the expected pre-dropout count of each gene in each cell based on the fitted  
182 model and the observed data. Again, we found it to be highly consistent with the true count (Fig.2c).

183 To examine whether there is overdispersion and zero-inflation in pre-dropout counts in reality,  
184 we used two scRNA-seq datasets where spike-ins are available (Zeisel et al., 2015), (Tung et al.,  
185 2017). Therefore, capture efficiencies could be estimated using the spike-ins to obtain reliable  
186 dropout models. To look for overdispersion, we first fit the DECENT model assuming an NB  
187 pre-dropout distribution to the data without considering zero-inflation. We found that without  
188 gene-specific dispersion parameters, the expected variances of most genes were noticeably lower  
189 than the observed values for the Zeisel *et al.* dataset. The extra variation was modeled by having  
190 the dispersion parameter (Supplementary Fig.3a). For the Tung *et al.* data, the expected variances  
191 without overdispersion parameters for most genes were already close to the observed values,  
192 showing little need for the extra parameter (Supplementary Fig.3b). This suggests overdispersion  
193 in pre-dropout counts is dataset-specific and depends on the amount of biological variability in  
194 the sample. The Tung *et al.* data used here are from one iPSC cell line where cells were highly  
195 homogeneous and hence lack biological variation. On the other hand, the Zeisel *et al.* data are  
196 from mouse brain tissue, which has a complex cellular composition. To check for zero-inflation, we  
197 then fitted DECENT models to the data assuming ZINB pre-dropout distributions. We performed  
198 chi-square goodness-of-fit test on both DECENT models with ZINB and NB to assess their adequacy.  
199 Consistent with previous findings (Vieth et al., 2017) (Chen et al., 2018), the majority of genes do  
200 not need to have a zero-inflated model. However we still found a small number of genes in both  
201 datasets in which models with ZINB provide a more adequate fit than NB (Supplementary Fig.4).

202 Overall, the ZINB distribution provides a comprehensive solution for modeling the pre-dropout  
203 molecule counts. Zero-inflation and overdispersion in gene-wise pre-dropout counts turned out to  
204 be dataset-specific and gene-specific. In the cases where these effects are less prominent, the ZINB  
205 distribution will have low pre-dropout zero-inflation and/or dispersion parameter estimates, and  
206 effectively turn into NB, zero-inflated Poisson or Poisson distributions.

207 Additionally, we investigated a single-molecule fluorescence *in situ* hybridization (smFISH)  
208 dataset. The smFISH technology allows precise quantification of RNA molecules from a list of  
209 targeted genes. This technology can achieve near 100% sensitivity detection of the RNA molecules  
210 (Raj et al., 2008). In other words, the smFISH count data may be a good approximation to the  
211 pre-dropout molecule counts and should follow our assumed distribution. We used the data from  
212 an experiment that profiled 33 marker genes in mouse somatosensory cortex (Codeluppi et al.,  
213 2018). We examined three of the clusters identified by the authors, Oligodendrocyte Mature,  
214 Pyramidal L4 and Inhibitory Vip, finding most of the gene count distribution to be significantly  
215 overdispersed relative to the Poisson (Supplementary Fig.5a). Yet we did not find zero-inflated  
216 genes in these clusters. This is quite possibly because the targeted genes are all canonical markers,  
217 which are expected to mostly exhibit constitutive expression and hence unlikely to have inflated  
218 zeros caused by transcriptional bursting. However, heterogeneity within a population can also result  
219 in zero-inflation, which is common in actual DE analysis. We thus increased the heterogeneity  
220 within the groups by focusing on three major cell types , Oligodendrocytes, Pyramidal neurons and  
221 Inhibitory neurons. We then identified two, one and two out of the 33 genes to have significant  
222 zero-inflation (Supplementary Fig.5b).

## 223 **Benchmarking using simulated data**

224 We next performed DE analysis using the simulated data and benchmarked DECENT against several  
225 existing methods. These includes SCDE (Kharchenko et al., 2014), MAST (Finak et al., 2015),  
226 Monocle2 (Trapnell et al., 2014) (Qiu et al., 2017), ZINB-WaVE adjusted edgeR (Van den Berge  
227 et al., 2018), and the standard edgeR (McCarthy et al., 2012) to represent bulk DE methods. We  
228 set a fraction of genes in the simulated data to have higher log fold-changes and used those as the  
229 reference genuine DEGs for benchmarking. Firstly, to assess the general ability of each method  
230 to distinguish between DEGs and non DEGs, we used the receiver operating characteristic (ROC)  
231 curves based on the nominal p-values produced by different methods. In actual DE analysis, usually  
232 only the low p-value region is of interest, so we used the partial ROC (pROC) curve (McClish, 1989)  
233 (Robin et al., 2011) focusing on the region with false positive rate smaller than 0.1. As shown in  
234 Fig.3a, DECENT outperformed all other methods in the simulation study. To further evaluate the  
235 level of false positives among the top discovered DEGs, we used the false discovery rate (FDR)  
236 curve, describing the fraction of false discoveries among the top n declared DEGs by each method.  
237 Again DECENT showed the smallest fraction of false discoveries consistently (Fig.3b).

238 Many existing scRNA-seq data datasets do not have spike-ins. Also, the recently popularized  
239 droplet-based technologies are incompatible with spike-ins. We therefore want to enable the usage of  
240 DECENT without spike-ins. To this end, we have developed a strategy to obtain functional dropout  
241 models only using information of endogenous genes. Basically, we assign ranked random capture  
242 efficiencies to each cells according the empirical distribution of the observed library size. We then  
243 fit the DECENT model assuming no spike-in information available. According to certain properties  
244 of our model, other components will compensate for the inaccuracy of capture efficiency estimates  
245 (Supplementary Fig.6, see Methods for details). To examine how this affect DE analysis, we set the

246 range of the ranked random capture efficiencies to be either the same as (1x), half (0.5x) or one and a  
247 half (1.5x) the true range. We found DE analysis is mostly unaffected by using this strategy to obtain  
248 dropout models and robust to inaccurate capture efficiencies. Except the performance decreases  
249 slightly when the capture efficiencies are specified too high (Supplementary Fig.7). This is possibly  
250 because the unaccounted variation is so large that it goes beyond the extent to which the model can  
251 adjust itself. Therefore, we generally recommend setting smaller ranges of capture efficiencies.

## 252 **Benchmarking using real data**

253 The simulation study has demonstrated the feasibility of our model mathematically. However, it  
254 cannot prove that our model assumptions or DE strategy are appropriate for genuine biological  
255 data and questions. Hence, we further benchmarked our model against existing methods using real  
256 datasets. The difficulty in benchmarking using real datasets is that the genuine DEGs are usually  
257 unknown. In order to obtain a credible list of genuine DEGs, we searched for scRNA-seq datasets  
258 that have matching bulk RNA-seq experiments, which means a bulk RNA-seq was also performed  
259 using cells from exactly the same tissues or cell lines. We found four such experiments in total that  
260 also used UMI. Then a DEG list derived from these bulk data can be used as the reference set for  
261 benchmarking. These includes two plate-based experiments and two droplet-based experiments,  
262 with different scales, sources of tissues or cell lines and observed proportion of zeros (Supplementary  
263 Table 2) (Tung et al., 2017) (Soumillon et al., 2014) (Savas et al., 2018) (Chen et al., 2018).

264 We again evaluated the performance using pROC and FDR curves. The same methods as  
265 the last section were benchmarked using all four datasets, except that we also applied TASC to the  
266 Tung *et al.* data where spike-ins are available. As shown in Fig.4 and 5, DECENT showed superior  
267 performance on all four datasets. MAST showed stable and generally acceptable performance across  
268 datasets, while the performance of SCDE appeared to be dataset-specific, showing inadequacy for

269 droplet-based experiments. The Monocle negative binomial-based model based on observed UMI  
270 count did not show satisfactory performance. The ZINB-WaVE adjustment of edgeR did not show  
271 noticeable improvements over standard edgeR for three out of four datasets. But it remarkably  
272 outperformed edgeR on the Chen *et al.* data, where both molecule counts and the cell numbers were  
273 high. To demonstrate the merit of performing DE analysis using a inferred pre-dropout rather than  
274 the observed expression, we selected a few genuine DEGs in the Tung *et al.* data that are detected  
275 by our method and compared their expression levels between the two cellular groups using either  
276 the observed counts or inferred pre-dropout counts. We discovered that the differential expression  
277 between two groups became more prominent in the pre-dropout counts (Supplementary Fig.8).

278 ERCC spike-ins were available in Tung *et al.* data. We thus used capture efficiencies estimated  
279 from spike-ins for the result shown. This dataset also enabled us to examine how specifying the  
280 ranked random capture efficiencies impacts DE performance on real data. We performed DECENT  
281 DE analysis again using the ranked random capture efficiencies specifying the range as half, the  
282 same and 1.5 times the range of the spike-in estimates. The results turned out to be in concordance  
283 with the simulation studies. Although optimal performance was achieved when capture efficiencies  
284 estimated from spike-ins were used, there were only small decreases in performance when using the  
285 ranked random capture efficiencies (Supplementary Fig.9). This convincingly demonstrated the  
286 viability of using the spike-in capture efficiencies for endogenous RNA and that DECENT's DE  
287 performance is also robust to misspecified capture efficiencies.

288 For the Soumillon *et al.* data, the median of the log fold-change estimates deviates from  
289 zero when the standard MLEs were used to estimate the cell size factors  $s_j$ . This default size factor  
290 estimator effectively performs library size normalization on the pre-dropout counts  $y_{ij}$ . The bias  
291 greatly reduced when using the trimmed mean of M values (TMM) method (Robinson and Oshlack,  
292 2010), to estimate the size factors instead and the overall performance of DECENT was slightly

293 improved (Supplementary Fig.10). This suggested that different datasets tend to require different  
294 normalization strategies, and suggested the flexibility of our method with regards to normalization  
295 strategy.

296 The benchmarking so far was based on two group comparisons. DECENT performs statistical  
297 tests under the well-established generalized linear model (GLM) framework and can  
298 readily accommodate more complex experimental designs. The Soumillon *et al.* data is a time  
299 course experiment, with three time points involved in adipose stem cell differentiation. This allowed  
300 us to have a glance at how different DE methods perform on more complex UMI-based scRNA-seq  
301 experiments beyond two-group comparisons. We tested the hypothesis that expression of a gene  
302 is constant across the three time points. Except for SCDE, which is designed only for two group  
303 comparison, and TASC, which requires spike-ins, other methods were compared in this setting.  
304 The reference genuine DEGs across the three time points were also derived from the matching  
305 bulk experiments. DECENT again outperformed all other methods with an even more pronounced  
306 advantage (Supplementary Fig.11).

### 307 **Controlling type I errors**

308 Finally, we examined the ability of DECENT to control type I errors. Towards this end, we created a  
309 scenario where no genuine DEGs are expected, thus all discovered DEGs are false positives. We  
310 randomly split the 221 cells from individual NA19239 in Tung *et al.* data in two groups of sizes  
311 110 and 111. Since the split is random, no biological variation would be expected between the two  
312 group of cells, on average. Then the same set of DE methods as above were used to perform DE  
313 analysis comparing the two groups. The null hypothesis should hold true for all the genes and hence  
314 the nominal p-values obtained from each method should be uniformly distributed. As shown in the  
315 quantile-quantile plots, most of the methods produced p-value distributions as desired, including

316 DECENT both with and without using the spike-ins. Only SCDE was producing a conservative  
317 p-value distribution with a spike at one, and the p-values from Monocle2 were skewed towards the  
318 lower end (Fig.6a). This suggests the negative binomial model fitted directly to the observed data as  
319 used in Monocle2 is not able to adjust for the extra variability in the molecule capturing process,  
320 thus producing false positives.

321 We conducted the comparison on twenty random splits of the cells. To perform an overall  
322 assessment, we calculated the observed proportion of declared DEGs by each method using a p-value  
323 cut-off of 0.05. This proportion equals type I error rate and is supposed to match the nominal  
324 p-value cut-off on each random splits. The results coincided with that shown in the single split case.  
325 Most methods consistently produced observed type I error rates close to 0.05, whereas SCDE was  
326 overly conservative and Monocle2 produced the largest number of false positives (Fig.6c).

327 We also carried out a similar analysis using the Soumillon *et al.* data. In each comparison,  
328 we randomly sampled two groups of 200 cells from day 0. And again twenty comparisons were  
329 conducted. Given the different features of this dataset, such as being more sparse, MAST exhibited  
330 overly low type I error rates with p-value cut-off 0.05, whereas DECENT still showed acceptable  
331 control of false positives (Fig.6b, 6d). This could be that the hurdle model used by MAST was  
332 overly adjusting for the observed zeros without distinguishing between dropouts and real biological  
333 ones. SCDE appeared to have more reasonable observed type I error rate in this case but a closer  
334 examination on p-value distribution revealed the same concerns as previously (Fig.6b).

## 335 Discussion

336 We presented DECENT, a novel statistical method for performing DE analysis on UMI-based  
337 scRNA-seq data. The UMI-count data has provided us with a great chance to model the molecule

338 capturing process. The technical variation occurring in this process is precisely characterized by  
339 gene and cell-specific beta-binomial dropout models. We were able to perform DE analysis on  
340 the inferred pre-dropout data where most technical variation was removed, and hence achieving  
341 superior performance. We demonstrated the flexibility of our model for being usable either with or  
342 without spike-ins and compatible with different normalization strategies. Also, the model is based  
343 on the established GLM theory thus capable of analyzing complex designed experiments. We tested  
344 model under the three group one-way ANOVA setting and obtained promising results. Adding more  
345 cell-level covariates would also be relatively straightforward (see Methods) and this is catered for in  
346 our software.

347 External RNA spike-ins, such as ERCC spike-ins (Jiang et al., 2011) are a good approach of  
348 measuring the technical variation in scRNA-seq data. We use them to estimate capture efficiencies in  
349 our model when available. They have also been used in some other scRNA-seq methods (Lun et al.,  
350 2017) (Jia et al., 2017). However, given the different features of external RNA spike-in molecules  
351 compared with endogenous transcripts such as poly(A) stretch and sequence length, it has been  
352 previously found that the amount of technical variation, such as the magnitude of capture efficiencies  
353 (Svensson et al., 2017), differs between the two types of molecules. Therefore, models estimated  
354 using spike-ins may not be entirely appropriate for endogenous transcripts. How to effectively make  
355 use of spike-ins is still a challenging topic in scRNA-seq data analysis. Efforts were made in looking  
356 for stably expressed genes in data to substitute for spike-ins (Lin et al., 2017) (Yip et al., 2017). We  
357 have used ERCC spike-in mainly as a tool for exploring. If we consider spike-ins as a separate  
358 groups of molecules that have a similar capture process to the endogenous RNA molecules, we can  
359 then use the same dropout parameters estimated using spike-ins when dealing with endogenous  
360 genes. But our method is also flexible enough and allows some of the dropout parameters to differ  
361 between the spike-ins and endogenous genes to reflect potential differences in the capture process of



362 the two types of molecules.

363 In our initial investigation of the dropout model, we found extra variation in the data compared  
364 to the cell-specific binomial dropout model. This extra variation is more likely to be spike-in-specific  
365 biases rather than random noise (Supplementary Fig.2). However, unlike cell-specific capture  
366 efficiencies, the estimated spike-in-specific biases cannot be applied to endogenous genes. Also,  
367 we are not able to estimate the gene-specific bias using gene abundance because it is not separable  
368 from actual gene mean expression. The separation is only achievable if extra information other than  
369 transcript abundance is available. For example, it is plausible that capture efficiencies would depend  
370 on gene sequence features such as GC-content and the length of the poly(A) stretch. A more refined  
371 dropout model might be built by modeling the relationship between these gene-specific features and  
372 the gene-specific biases of capture efficiency.

373 Although multilevel models with EM algorithm are intrinsically computationally intensive,  
374 DECENT has achieved acceptable speed with a series of acceleration approaches such as a gaussian  
375 quadrature approximation for large integration and parallelization of all the main steps. For instance,  
376 our 500 cells with 3,000 genes simulated data took ~18 minutes and the largest Chen et al. data  
377 with 6,875 cells and 12,929 genes took ~8 hours to finish on a 28-core XENON Radon Duo R1885  
378 server node with Intel(R) Xeon(R) E5-2690 v4 CPUS @ 2.60GHz.

379 Some existing models for scRNA-seq allow differential tests beyond the conventional DE  
380 analysis, such as testing on differences in the zero fraction, biological variation or even the overall  
381 distribution (Korthauer et al., 2016) (Wu et al., 2018) (Wang et al., 2018). But there is still difficulty  
382 in assessing the performance such as accuracy, type I error control, etc. of these types of tests due to  
383 lack of ground-truth. The smFISH technology is under rapid development. It is able to produce  
384 accurate measurements of the biological variation and the zero fraction. As the amount of data and  
385 number of genes profilable increases, this should provide us with an opportunity to assess these tests

386 objectively. While DECENT focuses on performing a reliable statistical test for the conventional  
387 DE of the mean, it could be extended for performing other types of tests in relatively straightforward  
388 manner, given its general modeling framework. For example, we can also model the zero-inflation  
389 parameter in the pre-dropout distribution as a function of cellular groups through a logistic linear  
390 regression model and test for differences in inflated biological zeros. However, some alteration of  
391 the parameter estimation strategy might be needed to achieve valid testing results.

## 392 **Methods**

### 393 **Model formulation**

394 DECENT assumes that unique molecular identifiers (UMI) (Islam et al., 2014) have been used in the  
395 scRNA-seq experiment for counting molecules. To permit separation of biological from technical  
396 variations, we first assume that in an idealized setting where all molecules are captured, the observed  
397 count  $y_{ij}$  for gene  $i$  in cell  $j$  can be modeled as a zero-inflated negative binomial (ZINB) random  
398 variable with parameters  $\theta_{ij} = (\pi_{0i}, \mu_{ij}, s_j, \psi_i)$ , where  $\pi_{0i}$  is a gene-specific zero-inflation parameter,  
399  $\psi_i$  is a gene-specific dispersion parameter,  $\mu_{ij}$  is the gene-specific and cellular group-specific mean  
400 parameter and  $s_j$  represents the size factor for cell  $j$  that measures differences in the amount of  
401 starting material, namely total mRNA between cells.

$$p(y_{ij} = k; \theta_{ij}) = \begin{cases} \pi_{0i} + (1 - \pi_{0i}) \left( \frac{\psi_i^{-1}}{\psi_i^{-1} + s_j \mu_{ij}} \right)^{\psi_i^{-1}}, & k = 0. \\ (1 - \pi_{0i}) \frac{\Gamma(\psi_i^{-1} + k)}{k! \Gamma(\psi_i^{-1})} \left( \frac{\psi_i^{-1}}{\psi_i^{-1} + s_j \mu_{ij}} \right)^{\psi_i^{-1}} \left( \frac{s_j \mu_{ij}}{\psi_i^{-1} + s_j \mu_{ij}} \right)^k, & k > 0. \end{cases} \quad (2)$$

402 The first line gives the probability of a biological zero. For lowly expressed genes with small  
403 mean parameter  $\mu_{ij}$ , the contribution from the second component can be considerable, but for higher

404 abundance genes, the probability of a biological zero largely depends on  $\pi_{0i}$ , with larger values of  
405 this parameter being closely associated with higher probabilities of a biological zero.

406 The gene-wise mean parameter  $\mu = (\mu_{ij})$  is assumed to depend on the cell type or group  
407 through a log-linear model

$$\log \mu = \mathbf{X}\boldsymbol{\beta} + \mathbf{W}\boldsymbol{\gamma} \quad (3)$$

408 where  $\mathbf{X}$  is the design matrix providing group information and  $\boldsymbol{\beta}$  are the coefficients. For the  
409 completeness of a generalized linear model framework, we also allow including cell-wise covariates  
410  $\mathbf{W}$  to remove unwanted variation (e.g batch effects, cell-cycle phases, etc.). In the most common  
411 two group comparisons, we have

$$\log \mu_{ij} = \beta_{0i} + \beta_{1i}x_j + \sum_{m=1}^q \gamma_{im}w_{mj} \quad (4)$$

412 where  $x_j$  is simply the binary indicator of cellular group and  $\beta_{1i}$  has interpretation as the log-fold  
413 change (logFC) parameter for gene  $i$ .

414 In reality,  $y_{ij}$  is unobservable. Instead we have the observed counts  $z_{ij}$  that are what remains  
415 of the  $y_{ij}$  after dropout. DECENT uses a modified beta-binomial distribution to model the capturing  
416 process (see Results). We suppose, given  $y_{ij}$  as the unobserved pro-dropout molecule count, that the  
417 observed count  $z_{ij}$  follow a beta-binomial distribution

$$P(z_{ij} = l \mid y_{ij} = k) = \binom{k}{l} \frac{\mathbf{B}(l + a_{ij}, k - l + b_{ij})}{\mathbf{B}(a_{ij}, b_{ij})}, \quad (5)$$

418 where  $\mathbf{B}(., .)$  is the Beta function. We reparametrize the model by

$$\eta_{ij} = \frac{a_{ij}}{a_{ij} + b_{ij}} = \eta_j \quad (6)$$

$$\rho_{ij} = \frac{1}{a_{ij} + b_{ij} + 1} \quad (7)$$

419 where we suppose  $\eta_{ij}$  does not depend on  $i$ , and so  $\eta_j$  represent the cell-specific capture  
420 efficiency in cell  $j$ . The amount of variability within the cell is measured by the dispersion parameter  
421  $\rho_{ij}$  that depends on the mean expression of gene  $i$  in cell  $j$  via a cell-specific linear model:

$$\text{logit}(\rho_{ij}) = \tau_{0j} + \tau_{1j} \cdot \log(s_j \mu_{ij}) \quad (8)$$

422 Capture efficiencies  $\eta_j$  are estimated using spike-ins when available. We also provide  
423 a strategy to produce functional capture efficiencies when spike-ins are not available. These  
424 will be discussed in the following sections. Since the pre-dropout counts for endogenous genes  
425 are unobserved, we use an Expectation-Maximization algorithm to estimate the gene-specific  
426 parameters  $\theta_i = \{\pi_{0i}, \beta_{0i}, \beta_{1i}, \underline{\gamma}_i, \psi_i\}$  and cell-specific parameters  $s_j$ . Not surprisingly, the E-step  
427 involves evaluating the conditional probability of an observed zero count being a biological zero,  
428  $P(E_{ij} = 0 \mid z_{ij} = 0; \theta_i^0, s_j^0) = 1 - P(E_{ij} = 1 \mid z_{ij} = 0; \theta_i^0, s_j^0)$ , where  $E_{ij}$  is a binary indicator of  
429 gene  $i$  being truly expressed in cell  $j$ , i.e.  $y_{ij} > 0$  (see Supplementary methods for details). The  
430  $\tau_j = (\tau_{0j}, \tau_{1j})$  parameters in the dropout model are estimated during the EM iterations using either  
431 spike-ins or endogenous gene counts. If endogenous genes are used to estimate  $\tau_j$  it would allow  
432 some dropout parameters to be different between the spike-ins and endogenous genes, reflecting  
433 inherent differences in their dropout processes.

## 434 **Estimating capture efficiencies**

435 Spike-in data are used to estimate the capture efficiencies when available. Suppose we added  $n$  spike-  
436 ins at the known concentrations  $c_1, c_2, \dots, c_n$  into cell  $j$  and subsequently observe  $z_{1j}, z_{2j}, \dots, z_{nj}$   
437 molecules respectively. The cell-specific capture efficiency for any cell  $j$  is estimated as the  
438 proportion of molecules observed after sequencing relative to the total number of molecules initially  
439 added:

$$\hat{\eta}_j = \frac{\sum_{i=1}^n z_{ij}}{\sum_{i=1}^n c_i}, \quad (9)$$

440 This is the method of moments estimator (MME) of  $\eta_j$  under the beta-binomial-Poisson model for  
441 spike-ins (see Supplementary Methods).

442 Many scRNA-seq data do not have spike-ins. Also, although the spike-in capture efficiencies  
443 can be used as a good approximation, they may not be exactly the same as those of endogenous RNA.  
444 Interestingly, we found that if we specified a set of inexact capture efficiencies, other components of  
445 the model will compensate for the inaccuracy and produce DE results almost as reliable as if we had  
446 the correct values. This is due to a property of our model that is explained below:

447 Let  $Y$  be the pre-dropout count where  $Y \sim \text{ZINB}(\pi_0, s, \mu, \psi)$ . Given  $Y$ , the observed data  $Z$   
448 follows Beta-Binomial distribution,  $Z | Y = y \sim \text{BB}(y, a, b)$ . This is the usual parametrization of  
449 beta distribution where  $\eta = \frac{a}{a+b}$  and  $\rho = (a + b + 1)^{-1}$ . It turns out that the marginal distribution  $F_Z$   
450 of  $Z$  can be approximated by the marginal distribution  $F_{Z'}$  of  $Z'$ , i.e.

$$F_Z(z; \pi_0, s, \mu, \psi, a, b) \approx F_{Z'}(z; \pi_0, s', \mu, \psi, a', b') \quad (10)$$

451 where  $Z' | Y' = y' \sim \text{BB}(y', a', b')$  and  $Y' \sim \text{ZINB}(\pi_0, s', \mu, \psi)$ . When we misspecify capture  
452 efficiency  $\eta$  as  $\eta'$ , then  $a, b$ , and  $s$  correspondingly become  $a' = \frac{\eta}{1-\eta'}b$ ,  $b' = \frac{\eta}{\eta'}b$  and  $s' = \frac{\eta}{\eta'}s$  to

453 keep a similar marginal distribution. This is illustrated in Supplementary Fig.6.

454       The above result means that if we misspecify the capture efficiency by using  $\eta'$  rather than  $\eta$ ,  
455 the misspecification can be approximately corrected by scaling the size factor estimates accordingly.  
456 The remaining effect will be compensated by adaptive estimation of  $\tau$ . Certainly it is still preferable  
457 to get capture-efficiency estimates as close as possible to the true value. Motivated by the above  
458 results and our experience with real datasets showing that capture-efficiency is the biggest factor  
459 contributing to the variation in the observed library sizes, we devised a method for generating  
460 functional capture efficiencies when spike-ins are not available:

461       This method requires the range of capture efficiency be supplied. Let the lower and upper  
462 bounds of this range be  $\min_{\eta}$  and  $\max_{\eta}$ , respectively. The cell-specific capture efficiencies are  
463 specified as follows:

- 464       • Compute library size for each cell and denote the  $\log_{10}$  of these by  $L_1, L_2, \dots, L_N$ . To minimize  
465 the impact of a few genes having very large counts, we can also use trimmed sums instead of  
466 full sums here. Denote the minimum and maximum  $\log_{10}$  library size as  $L_{min}$  and  $L_{max}$ .
- 467       • Calculate weight for cell  $j$  as  $w_j = \frac{L_j - L_{min}}{L_{max} - L_{min}}$ .
- 468       • Estimate the capture efficiency for cell  $j$  as  $(1 - w_j) \min_{\eta} + w_j \max_{\eta}$ . This ensures that cells  
469 with larger library size will have larger capture efficiency and the capture efficiency estimates  
470 are bounded within  $(\min_{\eta}, \max_{\eta})$  interval.

471 We refer to this as the ranked random capture efficiency.

## 472 **Estimating the parameters $\tau_j$**

473 Besides the capture efficiencies, the parameters  $\tau_j$  in the logistic model for the beta-binomial  
474 dispersion parameter are also crucial for the dropout model. Like capture efficiencies, we can opt to

475 use  $\tau_j$  estimated from spike-ins for endogenous genes, when spike-ins are available. But we can  
476 only estimate  $\tau_j$  using endogenous gene counts when spike-ins are not available. We found that the  
477  $\tau_j$  estimates for endogenous genes often differ from those for the spike-ins in real scRNA-seq data.  
478 Therefore, we strongly advise users to estimate the parameters  $\tau_j$  using endogenous gene counts.  
479 This also make the model more robust to misspecification of capture efficiencies, as the  $\hat{\tau}_j$  will now  
480 account for the variation due to inaccurate capture efficiencies. However, estimating cell-specific  $\hat{\tau}_j$   
481 using endogenous genes can be a difficult task especially for sparse data with low counts or large  
482 zero fractions. We therefore implemented two options for obtaining the  $\hat{\tau}_j$  estimates. The first  
483 one is to assume  $\hat{\tau}_j$  are constant across cells, resulting two global parameters ( $\tau_0, \tau_1$ ). Under this  
484 assumption, we have

485       Within each EM iteration, after the M-step (see Supplementary methods)

- 486       • Given  $\hat{\mu}_i, \hat{s}_j$  and capture efficiency estimates  $\hat{\eta}_j$ , the correlation parameter for each gene  $i$  is  
487       estimated by maximizing

$$\sum_j \log P_{BB}(z_{ij} \mid y_{ij} = \hat{s}_j \hat{\mu}_i, \hat{\eta}_j, \rho_i) \quad (11)$$

488       where  $P_{BB}$  is the Beta-Binomial density with probability  $\hat{\eta}_j$ , size parameter  $\hat{s}_j \hat{\mu}_i$  and dispersion  
489       parameter  $\rho_i$ .

- 490       • The  $\tau_0$  and  $\tau_1$  estimates are updated as the intercept and slope estimates of the following  
491       regression model:

$$\log \frac{\rho_i}{1 - \rho_i} = \tau_0 + \tau_1 \log\{\hat{\mu}_i(1 - \hat{\pi}_{0i})\} \quad (12)$$

492       When we have enough information in the data, the other option is to estimate cell-specific  $\hat{\tau}_j$

493 by

- 494 • Given  $\mathbb{E}(y_{ij} \mid z_{ij})$  from the E-step and CE estimates  $\hat{\eta}_j$ , for each cell  $j$ , the cell-specific  
495 parameters  $\tau_{0j}$  and  $\tau_{1j}$  are updated by maximizing the following log-likelihood

$$\sum_i \log P_{BB}(z_{ij} \mid y_{ij} = \mathbb{E}(y_{ij} \mid z_{ij}), \hat{\eta}_j, \rho_{ij}), \quad (13)$$

496 where  $\rho_{ij}$  is a function of  $\tau_{0j}$  and  $\tau_{1j}$  through

$$\log \frac{\rho_{ij}}{1 - \rho_{ij}} = \tau_{0j} + \tau_{1j} \log\{\hat{\mu}_i(1 - \hat{\pi}_{0i})\} \quad (14)$$

## 497 DE analyses

498 Differential expression across two cellular groups for the  $i^{th}$  gene is assessed by testing the hypotheses:

499

$$H_0 : \beta_{1i} = 0 \text{ vs } H_1 : \beta_{1i} \neq 0 \quad (15)$$

500 using the likelihood ratio test (LRT) statistic,

$$-2\{\ell_I(\theta_i = \hat{\theta}_i^{H_0}) - \ell_I(\theta_i = \hat{\theta}_i)\} \quad (16)$$

501 where  $\hat{\theta}_i^{H_0}$  is the maximum likelihood estimator (MLE) of  $\theta_i$  under the restriction that  $\beta_{1i} = 0$ ,  $\hat{\theta}_i$  is  
502 the MLE under the unrestricted model and  $\ell_I$  is the log-likelihood of the observed incomplete data  
503  $z_{ij}$ . For simple two cell-type comparisons, the statistic is approximately distributed as  $\chi_1^2$  under  
504  $H_0$ . More generally, when performing DE across  $p$  different cell-types or conditions, the statistic is  
505 approximately distributed as  $\chi_p^2$  under  $H_0$ .



---

## 506 Public datasets

- 507 • **Tung *et al.* dataset:** This dataset is from the (Tung et al., 2017) benchmarking scRNA-seq  
508 experiment. We downloaded the filtered UMI count matrix from their GitHub repository  
509 (<https://github.com/jdblischak/singleCellSeq>). The full dataset contains three Yoruba (YRI)  
510 induced pluripotent stem cell (iPSC) lines, with three 96-well plates per individual. ERCC  
511 spike-ins (Jiang et al., 2011) and UMI were used. Each replicate was also used to generate a  
512 matching bulk RNA-seq sample. We only used data of two individuals NA19101 (201 cells)  
513 and NA19239 (221 cells) for the analyses. Reference genuine DEGs were derived by selecting  
514 the 500 DEGs with smallest p-values produced by *limma-voom* (Ritchie et al., 2015) using the  
515 bulk RNA-seq samples of the two individuals.
- 516 • **Soumillon *et al.* dataset:** This dataset is publicly available from Gene Expression Omnibus  
517 (GEO) repository GSE53638. Cells were collected at different stages and different time  
518 points of directed differentiation of human adipose-derived stem/stromal cells (Soumillon  
519 et al., 2014). FACS sorted cells were sequenced using the SCRBS-seq protocol with UMI. To  
520 benchmark DE methods using a two group comparison, we compare the stage-3 differentiated  
521 cells at day 0 (baseline, 943 cells) versus day 7 (1006 cells). All three time points day 0,  
522 day 3 (1019 cells) and day 7 of stage-3 differentiated cells were used for the three group DE  
523 analysis. Cells have been filtered by the authors and genes with log total UMI counts over one  
524 median absolute deviation (MAD) lower than the median were removed after subsetting the  
525 cells. The matching bulk RNA-seq data have only one sample per time point. Therefore, we  
526 selected the 500 genes with the largest log fold-change as the reference genuine DEGs for two  
527 group comparison. We also used the 500 genes with largest variances across three time points  
528 for benchmarking the three group analysis. Log fold-changes and variances were calculated

529 based on log count per million (CPM) with high prior count 5 for stabilization.

530 • **Savas *et al.* dataset:** The experiment profiled the transcriptomes of tumour infiltrating T cells  
531 from triple-negative breast cancer patients. The full dataset is available from GSE110686.  
532 Pre-processing and cluster analysis were performed as described in (Savas *et al.*, 2018). We  
533 used the CD8<sup>+</sup> TRM (606 cells) and CD8<sup>+</sup> non-TRM (1097 cells) clusters (CD8<sup>+</sup>γδ together  
534 with CD8<sup>+</sup> effector memory) as the two groups to be compared. Data from case one was used  
535 in the analysis. A corresponding bulk RNA-seq experiment is available from GSE110938,  
536 comparing CD8<sup>+</sup>CD103<sup>+</sup> and CD8<sup>+</sup>CD103<sup>-</sup> FACS sorted populations. The bulk DEGs used  
537 as our reference gene list is available as a supplementary table in the original paper.

538 • **Chen *et al.* dataset:** The single-cell and bulk RNA-seq data are both available from GEO  
539 entry GSE113660. The scRNA-seq experiment profiled over six thousand cells from the Rh41  
540 cell line. After quality control and cluster analysis, two clusters representing respectively  
541 CD44<sup>+</sup> (3074 cells) and CD44<sup>-</sup> (3801 cells) populations were obtained. The cluster labels  
542 were acquired through personal contact with the authors. Genes with total UMI count less  
543 than 100 were filtered out. The matching bulk RNA-seq data has three batches. Each batch  
544 contains a CD44 high, a CD44 low and an unsorted sample obtained via FACS-sorting. The  
545 top 500 DEGs comparing CD44 high and CD44 low samples were used as reference DEGs.

546 • **Zeisel *et al.* dataset:** The experiment sequenced three thousand cells in the mouse somatosen-  
547 sory cortex and hippocampal CA1 region. Cells were classified into two levels of cell types.  
548 The dataset is available from the authors via: <http://linnarssonlab.org/cortex>. We only used  
549 the cells within the "pyramidal CA1" level 1 class for our analysis. This dataset exhibits very  
550 high proportions of spike-in counts in most cells. This suggests intense competition between  
551 the spike-in and endogenous molecules for read counts and the quantification of endogenous

552 genes is likely to be affected. To moderate this, we removed cells with more than 50% UMI  
553 counts coming from spike-ins when fitting the model for endogenous genes (remaining 932  
554 cells). We further filtered out genes with total UMI counts over one MAD lower than the  
555 median.

556 • **ERCC spike-in datasets:** Apart from the ERCC spike-in data within the Tung *et al.*  
557 and Zeisel *et al.* dataset, three other datasets were downloaded from their NCBI GEO  
558 repositories: GSE54695 (Grun *et al.*), GSE65525 (Klein *et al.*) and GSE63473 (Macosko  
559 *et al.*). The Zheng *et al.* ERCC spike-in experiment is available on the 10x Genomic  
560 website: <https://support.10xgenomics.com/single-cell-gene-expression/datasets/1.1.0/ercc>.  
561 All spike-in datasets underwent the same filtering steps. We removed spike-ins that have  
562 nominal count  $< 0.05$  or a mean observed count higher than the nominal count. We filtered  
563 out cells with total UMI counts more than 2 MADs below the median total UMI count.

564 • **osmFISH dataset:** The authors applied a newly developed cyclic single-molecule FISH  
565 protocol, termed ouroboros smFISH (osmFISH) to cells from the mouse somatosensory cortex  
566 tissue. The experiment quantified RNA molecules from 33 target genes in more than four  
567 thousand cells in a brain tissue section. The smFISH count data and cluster labels are available  
568 at <http://linnarssonlab.org/osmFISH/>.

## 569 **Fitting the dropout models using ERCC spike-ins**

570 We use a Poisson distribution to model the pre-dropout molecule count of spike-ins:

$$p(y_{ij} = k) = \frac{c_i^k}{k!} \exp(-c_i) \quad (17)$$

571 Under both the binomial and beta-binomial dropout models, the capture efficiency  $\eta_j$  is estimated  
572 as in (10) above. It is either the MLE or MME for  $\eta_j$  (see Supplementary Methods). In our  
573 investigation of the beta-binomial dropout model, we also needed to estimate the parameters  $\rho_i$  or  
574  $\tau_j$  in each cell-wise model. To take into account this Poisson variation in the estimation of  $\tau_j$  for  
575 spike-ins, we first simulate the unobserved count  $\tilde{y}_{ij}$  under  $\text{Poisson}(c_i)$ . Each spike-in was simulated  
576 50 times to achieve stable estimation. Then the the MLEs  $\hat{\rho}_i$  or  $\hat{\tau}_j$  under either  $BB(\tilde{y}_{ij}, \eta_j, \rho_i)$  or  
577  $BB(\tilde{y}_{ij}, \eta_j, \text{logit}^{-1}(\tau_{0j} + \tau_{1j} \log(c_i)))$  can be obtained by maximizing the beta-binomial likelihood  
578 function.

### 579 **Calculating the deviances for the binomial and beta-binomial dropout models**

580 Under the binomial dropout model, the distribution  $z_{ij}$  is another Poisson distribution with rate  $\eta_j c_i$   
581 because the binomial thinning of Poisson is still Poisson (Casella and Berger, 2002). Therefore, the  
582 binomial deviance for spike-in  $i$  in cell  $j$  is simply:

$$\mathfrak{d}_B(z_{ij}, \hat{\eta}_j c_i) = 2 \left( z_{ij} \log \frac{z_{ij}}{\hat{\eta}_j c_i} - z_{ij} + \hat{\eta}_j c_i \right) \quad (18)$$

583 Under the beta-binomial dropout model  $z_{ij} \mid y_{ij} \sim BB(\eta_j, y_{ij}, \rho_{ij})$ , the deviance for spike-in  $i$   
584 in cell  $j$  is given by,

$$\mathfrak{d}_{BB}(z_{ij}, \hat{\eta}_j c_i, \hat{\rho}_{ij}) = -2 \left\{ \log P(z_{ij}; c_i, \hat{\eta}_j, \hat{\rho}_{ij}) - \log P(z_{ij}; \frac{z_{ij}}{\hat{\eta}_j}, \hat{\eta}_j, \hat{\rho}_{ij}) \right\} \quad (19)$$

585 where  $P(z_{ij}; c, \eta, \rho) = \sum_y P(z_{ij} \mid y_{ij}; \eta, \rho) P(y_{ij}; c)$  is the marginal probability distribution of the  
586 observed data. Here  $P(z_{ij} \mid y_{ij}; \eta, \rho)$  and  $P(y_{ij}; c)$  are the beta-binomial and Poisson probability  
587 mass function (PMF). In practice, the marginal distribution was calculated numerically using  
588 Gaussian quadrature that approximates the summation as integration with a continuity correction.

589 Then the deviances for cell  $j$  models are

$$\mathbb{D}_B(\mathbf{z}_j, \hat{\eta}_j \mathbf{c}) = \sum_{i=1}^n \mathfrak{d}_B(z_{ij}, \hat{\eta}_j c_i) \quad (20)$$

590 or

$$\mathbb{D}_{BB}(\mathbf{z}_j, \hat{\eta}_j \mathbf{c}) = \sum_{i=1}^n \mathfrak{d}_{BB}(z_{ij}, \hat{\eta}_j c_i) \quad (21)$$

591 which asymptotically follow  $\chi_{n-1}^2$  and  $\chi_{n-3}^2$ , respectively, under the null hypothesis.

## 592 **Testing for overdispersion and zero-inflation in the smFISH data**

593 We denote the smFISH molecule count of gene  $i$  in cell  $j$  by  $y_{ij}$ , as it is supposed to be a accurate  
594 quantification of the actual RNA count without dropout. To investigate the pre-dropout distribution,  
595 we fitted three models:  $Poisson(s_j \mu_i)$ ,  $NB(s_j \mu_i, \psi_i)$  and  $ZINB(s_j \mu_i, \psi_i, \pi_i)$  to the  $(y_{ij})$ , where  $s_j$  is  
596 the cell-wise size factor with the restriction  $\bar{s} = 1$ ,  $\mu_i$  is the gene-wise mean parameter,  $\psi_i$  is the  
597 gene-specific NB dispersion parameter and  $\pi_i$  is the gene-specific zero-inflation parameter. Under  
598 all three models, the parameters  $s_j$  can all be estimated by MLE  $\hat{s}_j = \frac{\sum_i y_{ij}}{\frac{1}{m} \sum_j \sum_i y_{ij}}$ , where  $m$  is the  
599 number of cells. This allowed us to fit gene-wise models easily using the R GLM framework with  
600 the  $\hat{s}_j$  supplied as offsets. We used the *glm* function from the stats package to fit the Poisson models,  
601 the *glm.nb* function from the MASS (v7.3-50) package for fitting the NB models and the *zeroinfl*  
602 function in the pscl package (v1.5.2) for the ZINB models. To test for overdispersion in each gene,  
603 we used the Cameron and Trivedi's score test (Cameron and Trivedi, 1990) on the fitted gene-wise  
604 Poisson model. We used the *dispersiontest* function implemented in the AER(v1.2-5) R package  
605 with NB2 as the alternative model. As for testing zero-inflation, we performed a likelihood-ratio test  
606 between the fitted NB and ZINB model of each gene. Note that the null distribution in this case is  
607 asymptotically  $\frac{1}{2}\chi_0^2 + \frac{1}{2}\chi_1^2$  rather than  $\chi_1^2$  since the null hypothesis  $\pi_i = 0$  is on the boundary of the

608 parameter space  $[0,1]$ .

## 609 **Simulation**

610 We simulated data for 500 cells belonging to two different cell types (224 vs 276 cells for each  
611 type). For each cell, the observed count data for 3000 endogenous genes and 92 ERCC spike-ins are  
612 generated from a zero-inflated negative binomial (ZINB) model for the pre-dropout count. For each  
613 gene, the gene-specific mean and dispersion parameters are sampled randomly from the empirical  
614 distribution of these parameters in Tung's data for NA19101 and NA19239 cell lines. Because  
615 Tung's data contains atypically low percentage of zero counts for scRNA-seq data ( $\approx 35\%$ ), the  
616 mean parameter for our simulation studies is scaled by a factor of 0.1, resulting in approximately  
617 80% zero counts in the dataset. Approximately 10% of the genes are designated as DE genes and  
618 their fold-change parameters are randomly generated from Gamma(2,2) distribution. For non DE  
619 gene, the fold change parameters are set to 1.

620 Biological zeroes are added through zero-inflated parameter  $\pi_0$ , generated from Beta (3,17)  
621 distribution, which results in an average of 15% biological zeroes in the pre-dropout counts. The  
622 capture efficiency (CE) parameters are also generated from the empirical distribution of CE in data  
623 for NA19101 and NA19239 cell lines. Once the pre-dropout counts are simulated, the observed  
624 counts are generated by applying Beta-Binomial dropout model to the pre-dropout counts. Global  
625 dropout parameters are used with  $\tau_0 = -1.5$  and  $\tau_1 = -0.3$ . Finally, the size factor parameters are  
626 generated separately for the two cell-types so on average the first cell type has smaller size factor  
627 than the second. This is achieved by generating the size factors for the first cell type from (scaled)  
628 Gamma (4,5) distribution and for the second cell type from (scaled) Gamma (5,4) distribution.  
629 The scaling factors are chosen so that the average size factors across all cells is equal to 1. Before  
630 performing the benchmarking, we removed low abundance genes that are expressed in less than 3

631 cells.

## 632 **Performance evaluation**

633 The performance of different methods for identifying genuine DEGs was evaluated using the partial  
634 Receiver Operating Characteristic (pROC) curve of true positive rate (TPR) plotted against false  
635 positive rate (FPR) within the range of  $FPR < 0.1$  and false discovery rate (FDR) curve showing the  
636 FDR among the top  $n$  discovered DEGs. These rates are defined as:

$$TPR = \frac{TP}{TP + FN} \quad (22)$$

$$FPR = \frac{FP}{FP + TN} \quad (23)$$

$$FDR = \frac{FP}{FP + TP} \quad (24)$$

637 where TP, FP, TN and FN denote number of true positives, false positives, true negatives and false  
638 negatives, respectively.

## 639 **Benchmark settings**

640 DECENT were run with its default parameters on the Soumillon *et al.* and Savas *et al.* datasets.  
641 Cell-specific estimation of  $\tau_j$  was used in *Tung et al.* data and disabled in all the other data.  
642 This is because an acceptable amount of information in the data is required in order to obtain  
643 reliable cell-specific  $\tau_j$  estimates. Generally we suggest trying cell-specific estimation only on  
644 datasets having less than  $\sim 70\%$  observed zeros, and ideally with spike-ins to estimate the capture  
645 efficiencies. We increased the range of ranked random capture efficiencies for Chen *et al.* data from  
646 the default [0.02, 0.1] to [0.04, 0.2] given its high counts. We used the default settings for MAST  
647 (v1.6.1), Monocle2 (v2.8.0), TASC and edgeR (v3.22.2). Log CPM with prior count 1 was used

648 as input for MAST and the likelihood ratio test is used in edgeR. As for SCDE (v1.99.2), we set  
649 *min.count.threshold* to 1, increased *min.nonfailed* to 10 as suggested by the authors for using it on  
650 large-scale UMI data. For ZINB-WaVE (v1.2.0), the performance appears to be very sensitive to the  
651 parameter epsilon, and so we selected the optimal epsilon parameter for each dataset from a range of  
652  $10^3$  to  $10^{13}$ . The groups to be compared were supplied as cell-level covariate X. Other parameters  
653 including those in the following weighted edgeR analysis were left as default.

654 To derive reference DEGs, we used default settings of limma-voom (v3.36.1) for the DE  
655 analyses of the Tung *et al.* and Chen *et al.* matching bulk RNA-seq data. In these two cases, we  
656 retained genes with cpm > 1 in more than 3 samples. For the Chen *et al.* bulk data, a batch dummy  
657 variable was included in the design matrix to perform paired comparisons. For the Soumillon *et*  
658 *al.* bulk data, we retained genes with non-zero measurements in both day 0 and day 7 samples for  
659 two group comparison, and those which are positive in all three time points for the three group  
660 comparison. The top DEGs were inferred by ranking in terms of log fold-changes or variances as  
661 describe above.

662 The R scripts used for the analyses are available via GitHub:[https://github.com/cz-ye/DECENT-](https://github.com/cz-ye/DECENT-analysis)  
663 analysis.

## 664 **Software availability**

665 DECENT is implemented as a R package and available from the GitHub repository: [https://github.com/cz-](https://github.com/cz-ye/DECENT)  
666 [ye/DECENT](https://github.com/cz-ye/DECENT).

## 667 **Author Contributions**

668 A.S. and T.P.S conceived the idea and developed the methods. A.S. and C.Y. designed and developed  
669 the software. A.S. and C.Y conducted the simulation studies and C.Y conducted the real data



670 analyses. All authors contributed to interpretation of results, writing the manuscripts and approved  
671 the final submitted version of the manuscript.

## 672 References

- 673 Bacher, R., Chu, L.-F., Leng, N., Gasch, A. P., Thomson, J. A., Stewart, R. M., Newton, M., and  
674 Kendzierski, C. (2017). Scnorm: robust normalization of single-cell rna-seq data. *Nature*  
675 *Methods*, 14:584.
- 676 Brennecke, P., Anders, S., Kim, J. K., Kolodziejczyk, A. A., Zhang, X., Proserpio, V., Baying,  
677 B., Benes, V., Teichmann, S. A., Marioni, J. C., and Heisler, M. G. (2013). Accounting for  
678 technical noise in single-cell rna-seq experiments. *Nature Methods*, 10(11):1093–1095.
- 679 Buettner, F., Natarajan, K. N., Casale, F. P., Proserpio, V., Scialdone, A., Theis, F. J., Teichmann,  
680 S. A., Marioni, J. C., and Stegle, O. (2015). Computational analysis of cell-to-cell hetero-  
681 geneity in single-cell rna-sequencing data reveals hidden subpopulations of cells. *Nature*  
682 *Biotechnology*, 33(2):155–160.
- 683 Cameron, A. and Trivedi, P. K. (1990). Regression-based tests for overdispersion in the poisson  
684 model. *Journal of Econometrics*, 46(3):347 – 364.
- 685 Casella, G. and Berger, R. (2002). *Statistical Inference*. Duxbury advanced series in statistics and  
686 decision sciences. Thomson Learning.
- 687 Chen, W., Li, Y., Easton, J., Finkelstein, D., Wu, G., and Chen, X. (2018). Umi-count modeling  
688 and differential expression analysis for single-cell rna sequencing. *Genome Biology*, 19(1):70.
- 689 Codeluppi, S., Borm, L. E., Zeisel, A., La Manno, G., van Lunteren, J. A., Svensson, C. I., and  
690 Linnarsson, S. (2018). Spatial organization of the somatosensory cortex revealed by cyclic  
691 smfish. *bioRxiv*.
- 692 Finak, G., McDavid, A., Yajima, M., Deng, J., Gersuk, V., Shalek, A. K., Slichter, C. K., Miller,  
693 H. W., McElrath, M. J., Prlic, M., Linsley, P. S., and Gottardo, R. (2015). Mast: a flexible  
694 statistical framework for assessing transcriptional changes and characterizing heterogeneity  
695 in single-cell rna sequencing data. *Genome Biology*, 16(1):278.
- 696 Grun, D., Kester, L., and van Oudenaarden, A. (2014). Validation of noise models for single-cell  
697 transcriptomics. *Nature Methods*, 11(6):637–640.
- 698 Hashimshony, T., Wagner, F., Sher, N., and Yanai, I. (2012). Cel-seq: Single-cell rna-seq by  
699 multiplexed linear amplification. *Cell Reports*, 2(3):666–673.
- 700 Huang, M., Wang, J., Torre, E., Dueck, H., Shaffer, S., Bonasio, R., Murray, J. I., Raj, A., Li,  
701 M., and Zhang, N. R. (2018). Saver: gene expression recovery for single-cell rna sequencing.  
702 *Nature Methods*, 15(7):539–542.
- 703 Islam, S., Zeisel, A., Joost, S., La Manno, G., Zajac, P., Kasper, M., Lonnerberg, P., and  
704 Linnarsson, S. (2014). Quantitative single-cell rna-seq with unique molecular identifiers.  
705 *Nature Methods*, 11(2):163–166.

- 706 Jia, C., Hu, Y., Kelly, D., Kim, J., Li, M., and Zhang, N. R. (2017). Accounting for technical  
707 noise in differential expression analysis of single-cell rna sequencing data. *Nucleic Acids*  
708 *Research*, 45(19):10978–10988.
- 709 Jiang, L., Schlesinger, F., Davis, C. A., Zhang, Y., Li, R., Salit, M., Gingeras, T. R., and  
710 Oliver, B. (2011). Synthetic spike-in standards for rna-seq experiments. *Genome Research*,  
711 21(9):1543–1551.
- 712 Kharchenko, P. V., Silberstein, L., and Scadden, D. T. (2014). Bayesian approach to single-cell  
713 differential expression analysis. *Nature Methods*, 11(7):740–742.
- 714 Kiselev, V. Y., Kirschner, K., Schaub, M. T., Andrews, T., Yiu, A., Chandra, T., Natarajan, K. N.,  
715 Reik, W., Barahona, M., Green, A. R., and Hemberg, M. (2017). Sc3: consensus clustering  
716 of single-cell rna-seq data. *Nature Methods*, 14:483.
- 717 Klein, A. M., Mazutis, L., Akartuna, I., Tallapragada, N., Veres, A., Li, V., Peshkin, L., Weitz,  
718 D. A., and Kirschner, M. W. (2015). Droplet barcoding for single-cell transcriptomics applied  
719 to embryonic stem cells. *Cell*, 161(5):1187–1201.
- 720 Kolodziejczyk, A. A., Kim, J. K., Svensson, V., Marioni, J. C., and Teichmann, S. A. (2015). The  
721 technology and biology of single-cell rna sequencing. *Molecular Cell*, 58(4):610–620.
- 722 Korthauer, K. D., Chu, L.-F., Newton, M. A., Li, Y., Thomson, J., Stewart, R., and Kendzioriski,  
723 C. (2016). A statistical approach for identifying differential distributions in single-cell rna-seq  
724 experiments. *Genome Biology*, 17(1):222.
- 725 Lin, Y., Ghazanfar, S., Strbenac, D., Wang, A., Patrick, E., Speed, T., Yang, J., and Yang, P.  
726 (2017). Housekeeping genes, revisited at the single-cell level. *bioRxiv*.
- 727 Love, M. I., Huber, W., and Anders, S. (2014). Moderated estimation of fold change and dispersion  
728 for rna-seq data with deseq2. *Genome Biology*, 15(12):550.
- 729 Lun, A. T., Bach, K., and Marioni, J. C. (2016). Pooling across cells to normalize single-cell rna  
730 sequencing data with many zero counts. *Genome Biology*, 17(1):75.
- 731 Lun, A. T., Calero-Nieto, F. J., Haim-Vilmovsky, L., Göttgens, B., and Marioni, J. C. (2017).  
732 Assessing the reliability of spike-in normalization for analyses of single-cell rna sequencing  
733 data. *Genome Research*.
- 734 Macosko, E. Z., Basu, A., Satija, R., Nemesh, J., Shekhar, K., Goldman, M., Tirosh, I., Bialas,  
735 A. R., Kamitaki, N., Martersteck, E. M., Trombetta, J. J., Weitz, D. A., Sanes, J. R., Shalek,  
736 A. K., Regev, A., and McCarroll, S. A. (2015). Highly parallel genome-wide expression  
737 profiling of individual cells using nanoliter droplets. *Cell*, 161(5):1202–1214.
- 738 McCarthy, D. J., Chen, Y., and Smyth, G. K. (2012). Differential expression analysis of  
739 multifactor rna-seq experiments with respect to biological variation. *Nucleic Acids Research*,  
740 40(10):4288–4297.

- 741     McClish, D. K. (1989). Analyzing a portion of the roc curve. *Medical Decision Making*,  
742     9(3):190–195.
- 743     Qiu, X., Mao, Q., Tang, Y., Wang, L., Chawla, R., Pliner, H. A., and Trapnell, C. (2017). Reversed  
744     graph embedding resolves complex single-cell trajectories. *Nature Methods*, 14:979.
- 745     Raj, A., Peskin, C. S., Tranchina, D., Vargas, D. Y., and Tyagi, S. (2006). Stochastic mrna  
746     synthesis in mammalian cells. *PLoS Biology*, 4(10):e309.
- 747     Raj, A., van den Bogaard, P., Rifkin, S. A., van Oudenaarden, A., and Tyagi, S. (2008). Imaging  
748     individual mrna molecules using multiple singly labeled probes. *Nature Methods*, 5:877.
- 749     Ramskold, D., Luo, S., Wang, Y.-C., Li, R., Deng, Q., Faridani, O. R., Daniels, G. A., Khrebtkova,  
750     I., Loring, J. F., Laurent, L. C., Schroth, G. P., and Sandberg, R. (2012). Full-length mrna-seq  
751     from single-cell levels of rna and individual circulating tumor cells. *Nature Biotechnology*,  
752     30(8):777–782.
- 753     Risso, D., Perraudeau, F., Gribkova, S., Dudoit, S., and Vert, J.-P. (2018). A general and flexible  
754     method for signal extraction from single-cell rna-seq data. *Nature Communications*, 9(1):284.
- 755     Ritchie, M. E., Phipson, B., Wu, D., Hu, Y., Law, C. W., Shi, W., and Smyth, G. K. (2015). limma  
756     powers differential expression analyses for rna-sequencing and microarray studies. *Nucleic  
757     Acids Research*, 43(7):e47–e47.
- 758     Robin, X., Turck, N., Hainard, A., Tiberti, N., Lisacek, F., Sanchez, J.-C., and Müller, M.  
759     (2011). proc: an open-source package for r and s+ to analyze and compare roc curves. *BMC  
760     Bioinformatics*, 12(1):77.
- 761     Robinson, M. D., McCarthy, D. J., and Smyth, G. K. (2010). edgeR: a bioconductor package for  
762     differential expression analysis of digital gene expression data. *Bioinformatics*, 26(1):139–140.
- 763     Robinson, M. D. and Oshlack, A. (2010). A scaling normalization method for differential  
764     expression analysis of rna-seq data. *Genome Biology*, 11(3):R25.
- 765     Savas, P., Virassamy, B., Ye, C., Salim, A., Mintoff, C. P., Caramia, F., Salgado, R., Byrne, D. J.,  
766     Teo, Z. L., Dushyanthen, S., Byrne, A., Wein, L., Luen, S. J., Poliness, C., Nightingale, S. S.,  
767     Skandarajah, A. S., Gyorki, D. E., Thornton, C. M., Beavis, P. A., Fox, S. B., Darcy, P. K.,  
768     Speed, T. P., Mackay, L. K., Neeson, P. J., and Loi, S. (2018). Single-cell profiling of breast  
769     cancer t cells reveals a tissue-resident memory subset associated with improved prognosis.  
770     *Nature Medicine*, 24(7):986–993.
- 771     Shalek, A. K., Satija, R., Adiconis, X., Gertner, R. S., Gaublomme, J. T., Raychowdhury, R.,  
772     Schwartz, S., Yosef, N., Malboeuf, C., Lu, D., Trombetta, J. J., Gennert, D., Gnirke, A., Goren,  
773     A., Hacohen, N., Levin, J. Z., Park, H., and Regev, A. (2013). Single-cell transcriptomics  
774     reveals bimodality in expression and splicing in immune cells. *Nature*, 498:236.
- 775     Soumillon, M., Cacchiarelli, D., Semrau, S., van Oudenaarden, A., and Mikkelsen, T. S. (2014).  
776     Characterization of directed differentiation by high-throughput single-cell rna-seq. *bioRxiv*.

- 777 Sun, Z., Wang, C.-Y., Lawson, D. A., Kwek, S., Velozo, H. G., Owyong, M., Lai, M.-D., Fong,  
778 L., Wilson, M., Su, H., Werb, Z., and Cooke, D. L. (2018). Single-cell rna sequencing  
779 reveals gene expression signatures of breast cancer-associated endothelial cells. *Oncotarget*,  
780 9(13):10945–10961.
- 781 Svensson, V., Natarajan, K. N., Ly, L.-H., Miragaia, R. J., Labalette, C., Macaulay, I. C., Cvejic,  
782 A., and Teichmann, S. A. (2017). Power analysis of single-cell rna-sequencing experiments.  
783 *Nature Methods*, 14(4):381–387.
- 784 Trapnell, C., Cacchiarelli, D., Grimsby, J., Pokharel, P., Li, S., Morse, M., Lennon, N. J., Livak,  
785 K. J., Mikkelsen, T. S., and Rinn, J. L. (2014). The dynamics and regulators of cell fate  
786 decisions are revealed by pseudotemporal ordering of single cells. *Nature Biotechnology*,  
787 32:381.
- 788 Tung, P.-Y., Blischak, J. D., Hsiao, C. J., Knowles, D. A., Burnett, J. E., Pritchard, J. K., and  
789 Gilad, Y. (2017). Batch effects and the effective design of single-cell gene expression studies.  
790 *Scientific Reports*, 7:39921.
- 791 Van den Berge, K., Perraudeau, F., Soneson, C., Love, M. I., Risso, D., Vert, J.-P., Robinson,  
792 M. D., Dudoit, S., and Clement, L. (2018). Observation weights unlock bulk rna-seq tools for  
793 zero inflation and single-cell applications. *Genome Biology*, 19(1):24.
- 794 van Dijk, D., Sharma, R., Nainys, J., Yim, K., Kathail, P., Carr, A. J., Burdziak, C., Moon, K. R.,  
795 Chaffer, C. L., Pattabiraman, D., Bieri, B., Mazutis, L., Wolf, G., Krishnaswamy, S., and  
796 Pe'er, D. (2018). Recovering gene interactions from single-cell data using data diffusion. *Cell*.
- 797 Vieth, B., Ziegenhain, C., Parekh, S., Enard, W., and Hellmann, I. (2017). powsimr: power  
798 analysis for bulk and single cell rna-seq experiments. *Bioinformatics*, 33(21):3486–3488.
- 799 Wagner, A., Regev, A., and Yosef, N. (2016). Revealing the vectors of cellular identity with  
800 single-cell genomics. *Nature Biotechnology*, 34(11):1145–1160.
- 801 Wang, B., Zhu, J., Pierson, E., Ramazzotti, D., and Batzoglou, S. (2017). Visualization and  
802 analysis of single-cell rna-seq data by kernel-based similarity learning. *Nature Methods*,  
803 14:414.
- 804 Wang, J., Huang, M., Torre, E., Dueck, H., Shaffer, S., Murray, J., Raj, A., Li, M., and Zhang,  
805 N. R. (2018). Gene expression distribution deconvolution in single-cell rna sequencing.  
806 *Proceedings of the National Academy of Sciences*.
- 807 Wu, Z., Zhang, Y., Stitzel, M. L., and Wu, H. (2018). Two-phase differential expression analysis  
808 for single cell rna-seq. *Bioinformatics*, pages bty329–bty329.
- 809 Yip, S. H., Wang, P., Kocher, J.-P. A., Sham, P. C., and Wang, J. (2017). Linnorm: improved  
810 statistical analysis for single cell rna-seq expression data. *Nucleic Acids Research*, 45(22):e179–  
811 e179.

- 812 Zeisel, A., Muñoz-Manchado, A. B., Codeluppi, S., Lönnerberg, P., La Manno, G., Juréus, A.,  
813 Marques, S., Munguba, H., He, L., Betsholtz, C., Rolny, C., Castelo-Branco, G., Hjerling-  
814 Leffler, J., and Linnarsson, S. (2015). Cell types in the mouse cortex and hippocampus  
815 revealed by single-cell rna-seq. *Science*, 347(6226):1138–1142.
- 816 Zhao, X., Gao, S., Wu, Z., Kajigaya, S., Feng, X., Liu, Q., Townsley, D. M., Cooper, J., Chen, J.,  
817 Keyvanfar, K., Fernandez Ibanez, M. d. P., Wang, X., and Young, N. S. (2017). Single-cell  
818 rna-seq reveals a distinct transcriptome signature of aneuploid hematopoietic cells. *Blood*,  
819 130(25):2762–2773.
- 820 Zheng, G. X. Y., Terry, J. M., Belgrader, P., Ryvkin, P., Bent, Z. W., Wilson, R., Ziraldo, S. B.,  
821 Wheeler, T. D., McDermott, G. P., Zhu, J., Gregory, M. T., Shuga, J., Montesclaros, L.,  
822 Underwood, J. G., Masquelier, D. A., Nishimura, S. Y., Schnall-Levin, M., Wyatt, P. W.,  
823 Hindson, C. M., Bharadwaj, R., Wong, A., Ness, K. D., Beppu, L. W., Deeg, H. J., McFarland,  
824 C., Loeb, K. R., Valente, W. J., Ericson, N. G., Stevens, E. A., Radich, J. P., Mikkelsen, T. S.,  
825 Hindson, B. J., and Bielas, J. H. (2017). Massively parallel digital transcriptional profiling of  
826 single cells. *Nature Communications*, 8:14049.

827 **Figures**

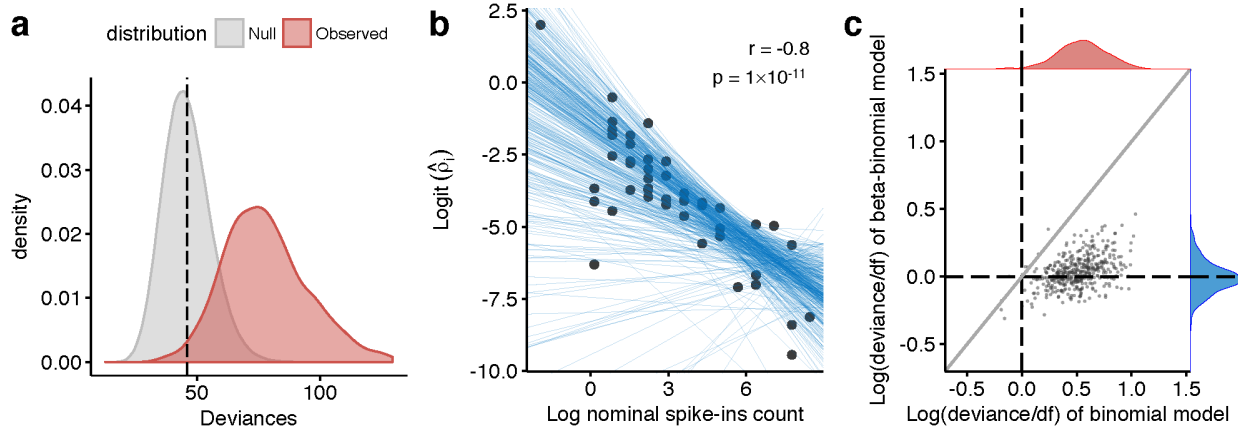

**Figure 1: Modeling extra-binomial variation in the molecule capturing process.** We evaluate the binomial and beta-binomial dropout models using the ERCC spike-in data from the Tung *et al.* experiment. **(a)** The observed distribution (red) of deviances with cell-wise binomial dropout model shows notable deviation from the expected  $\chi^2$  distribution the under null hypothesis. This indicates inadequacy of the binomial dropout model. **(b)** Modeling the relationship between the spike-in nominal count  $c_i$  and the dispersion parameter  $\rho$  in the beta-binomial dropout model. If the parameter is estimated in a spike-in specific manner, a high correlation between the  $\rho_i$  estimates and the true pre-dropout mean abundance, namely the nominal count  $c_i$ , can be observed, which are shown as black points. We build a cell-wise linear model to characterize this relationship. Each blue line represents a fitted cell-wise model, which is shown to adequately describe this relationship. **(c)**: A scatter plot comparing the cell-wise deviances under the binomial and beta-binomial dropout models to assess goodness-of-fit. Deviances were standardized by dividing by the degrees of freedom to enable comparison, and logged. The blue and red marginal densities represent the observed distributions of deviances under the two models respectively. It can be seen that the beta-binomial dropout model fits better than the binomial model in the majority of the cells.

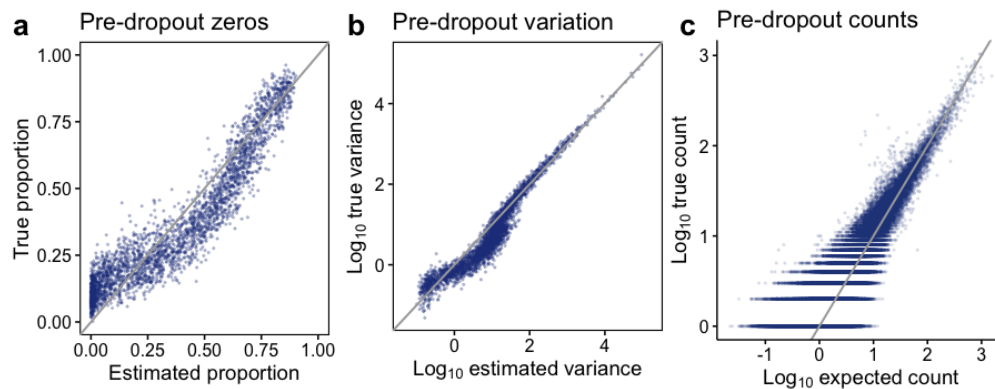

**Figure 2: Inferring pre-dropout molecule counts in simulation.** (a) Scatter plot comparing for each gene the estimated proportion of zeros of the fitted pre-dropout distribution with the true proportion of zeros in the pre-dropout counts. (b) Scatter plot comparing the expected variance of the fitted pre-dropout distribution with the true gene-wise variance in the pre-dropout counts. (c) Scatter plot comparing the expected value of pre-dropout count (see Supplementary methods for details) under the fitted model with the true pre-dropout counts. We showed a random subsample of 5 percent of all the non-zero counts. The estimated pre-dropout counts used to calculate (a) and (b) were based on single imputation, i.e., drawing a single value from the conditional pre-dropout distribution for each gene and each cell given the parameter estimates and the observed data. The estimated pre-dropout counts shown in (c) were calculated as the expected value of the conditional pre-dropout distribution (See Supplementary Methods).



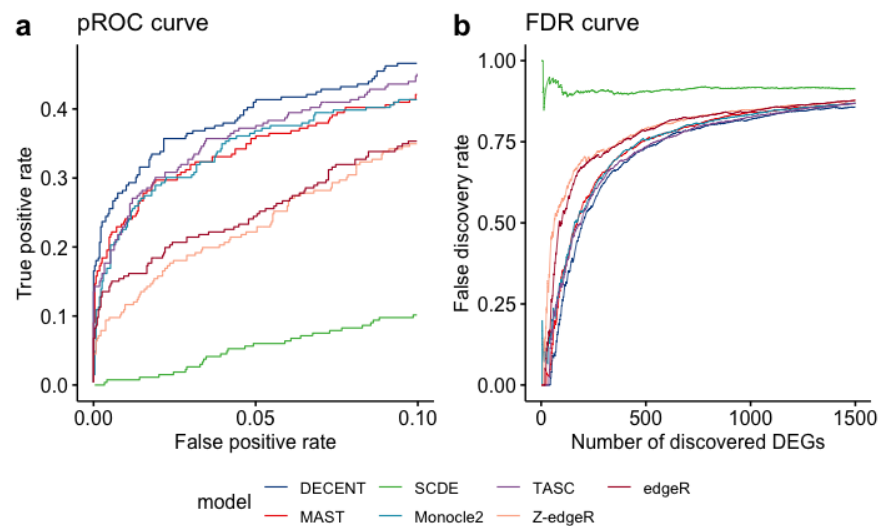

Figure 3: **Differential expression analysis of simulated data.** (a) Partial receiver operating characteristic curve for differential expression methods on the simulated data. (b) False discovery rate curves for differential expression methods on the simulated data. Both curves only focus on the low p-value region, since other regions were of little interest in actual DE analysis. Z-edgeR stands for ZINB-WaVE-adjusted edgeR.

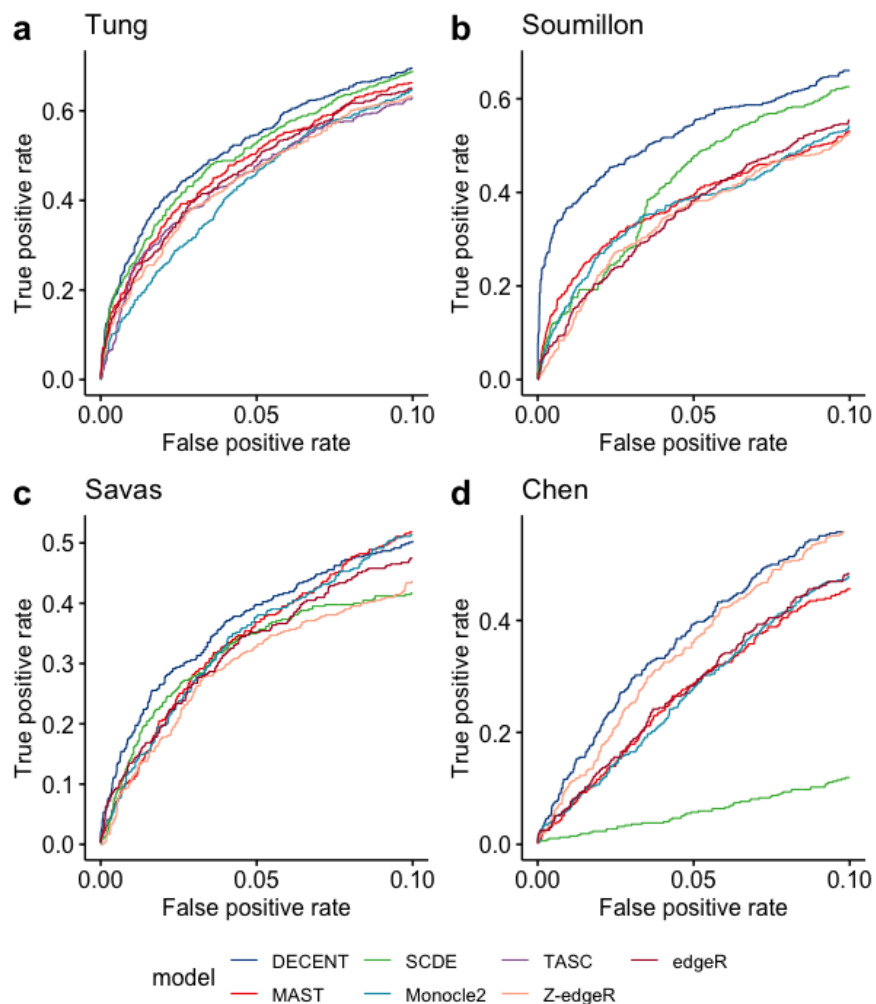

Figure 4: **Partial receiver operating characteristic curves for differential expression methods on real datasets.** Evaluating the performance of different methods by partial receiver operating characteristic curves using (a) Tung *et al.*, (b) Soumillon *et al.*, (c) Savas *et al.* and (d) Chen *et al.* datasets. DEGs from matching bulk RNA-seq data were used as gold-standard for benchmarking. DECENT achieves highest accuracy of identifying genuine DEGs in all four datasets. We used pROC to focus on the low p-value region with high specificity. DE methods are denoted by different colors. Z-edgeR stands for ZINB-WaVE-adjusted edgeR. TASC requires spike-ins and was only evaluated using the Tung *et al.* data.

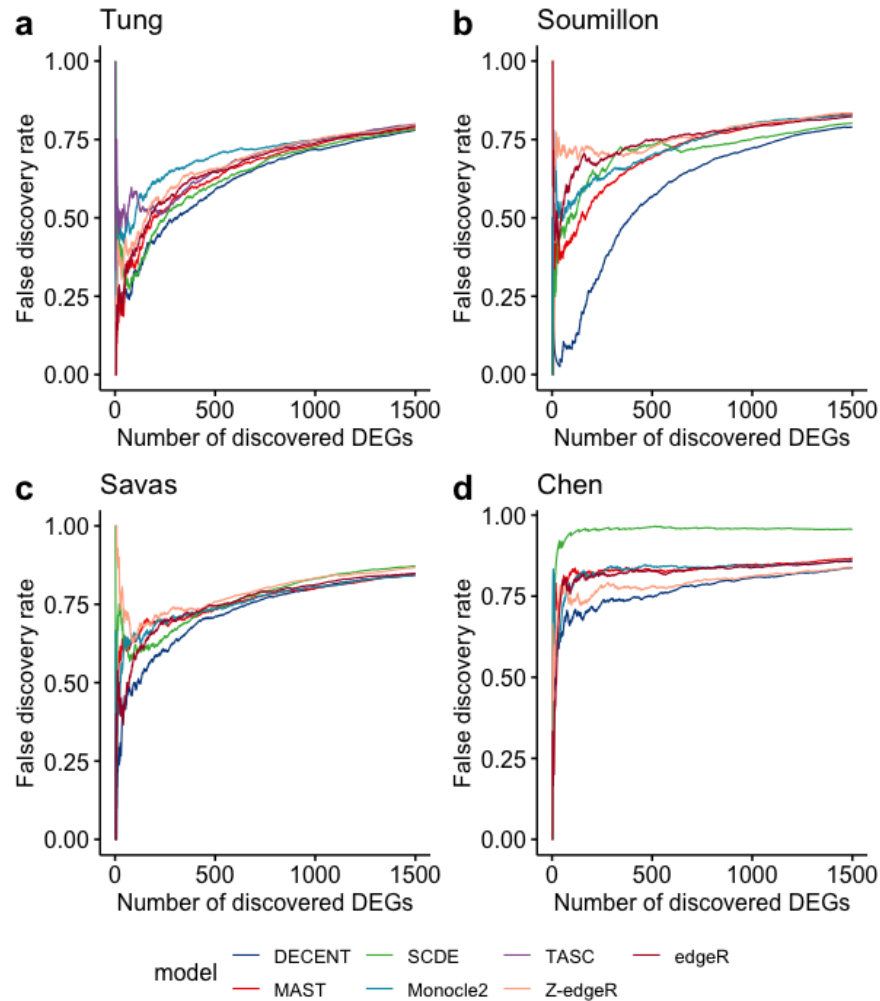

Figure 5: **False discovery rate curves for differential expression methods on real datasets.** Evaluating the performance different method by false discovery rate (FDR) curves using (a) Tung *et al.*, (b) Soumillon *et al.*, (c) Savas *et al.* and (d) Chen *et al.* datasets. Bulk DEGs were considered as conditional positives. DECENT consistently showed the lowest number of false discoveries at the same number of declared DEGs across all four datasets. Again only the top one thousand DEGs were considered to focus on the region of interested. DE methods are denoted by different colors. Z-edgeR denotes ZINB-WaVE-adjusted edgeR. TASC requires spike-ins and was only evaluated using Tung *et al.* data.

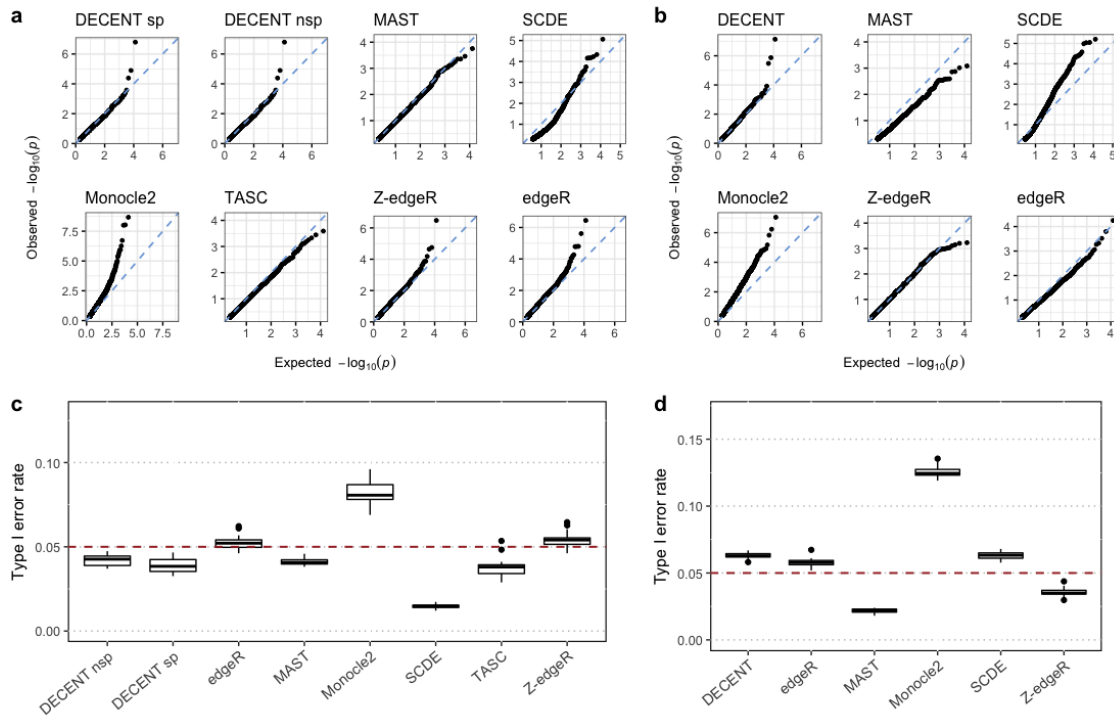

**Figure 6: Controlling Type I error rate.** We evaluated nominal p-value distributions and type I error rates produce by differential expression methods in absence of genuine DEGs. In panels (a) and (c), nominal p-values were obtained by comparing two random split group of cells from the NA19239 cell line in the Tung *et al.* dataset. The random split and comparison was performed 20 times. For panels (b) and (d), nominal p-values were produced by different methods on two randomly sampled groups from stage 3 day 0 cells in the Soumillon *et al.* data. The sampling and comparison was again performed 20 times. (a) (b) shows quantile-quantile plots of nominal p-values produced by different methods comparing the quantiles of their distribution with the uniform distribution. (c) (d) shows observed type I error rates by using a p-value cut-off of 0.05 on nominal p-values produced by different DE methods. Each box was generated based on the same comparisons (n=20) using for both datasets. DECENT nsp denotes DECENT without using spike-ins to estimate capture efficiencies. Overall, DECENT exhibits normal p-value distributions and reasonable control of type I errors in both case.
